# Supplementary material
Source: PubMed Central journal article supplement (PMC8790664)
Supplement: jama-e2124110-s001.pdf [file jama-e2124110-s001.pdf]

## Supplemental Online Content

Oster ME, Shay DK, Su JR, et al. Myocarditis cases reported after mRNA-based COVID-19 vaccination in the US from December 2020 to August 2021. *JAMA*. doi:10.1001/jama.2021.24110

**eMethods.** Medical Dictionary for Regulatory Activities Preferred Terms, Definitions of Myocarditis and Pericarditis, Myocarditis medical review form

**eFigure.** Flow diagram of cases of myocarditis and pericarditis reported to Vaccine Adverse Event Reporting System (VAERS) after receiving mRNA-based COVID-19 vaccine, United States, December 14, 2020-August 31, 2021.

**eTable 1.** Characteristics of all myocarditis cases reported to Vaccine Adverse Event Reporting System (VAERS) after mRNA-based COVID-19 vaccination, United States, December 14, 2020–August 31, 2021.

**eTable 2.** Characteristics of all pericarditis cases reported to Vaccine Adverse Event Reporting System (VAERS) after mRNA-based COVID-19 vaccination, United States, December 14, 2020–August 31, 2021.

**eTable 3.** Characteristics of myocarditis cases reported to Vaccine Adverse Event Reporting System after mRNA-based COVID-19 vaccination by case definition status.

This supplemental material has been provided by the authors to give readers additional information about their work.

**eMethods.** Medical Dictionary for Regulatory Activities Preferred Terms, Definitions of Myocarditis and Pericarditis, Myocarditis medical review form

The following Medical Dictionary for Regulatory Activities Preferred Terms were used for identification of reports of myocarditis and pericarditis:

**Myocarditis:**

Autoimmune myocarditis  
Coxsackie myocarditis  
Cytomegalovirus myocarditis  
Enterovirus myocarditis  
Eosinophilic myocarditis  
Hypersensitivity myocarditis  
Immune-mediated myocarditis  
Myocarditis  
Myocarditis bacterial  
Myocarditis helminthic  
Myocarditis infectious  
Myocarditis meningococcal  
Myocarditis mycotic  
Myocarditis post infection  
Myocarditis septic  
Viral myocarditis

**Pericarditis:**

Atypical mycobacterium pericarditis  
Autoimmune pericarditis  
Bacterial pericarditis  
Coxsackie pericarditis  
Cytomegalovirus pericarditis  
Pericarditis  
Pericarditis adhesive  
Pericarditis constrictive  
Pericarditis helminthic  
Pericarditis infective  
Pericarditis mycoplasmal  
Pleuropericarditis  
Purulent Pericarditis  
Viral pericarditis

## Acute Myocarditis

### Clinical myocarditis

#### Probable Case

1. Presence of  $\geq 1$  new or worsening of the following clinical symptoms:
  - chest pain/pressure/discomfort
  - dyspnea/shortness of breath/pain with breathing
  - palpitations
  - syncope

OR, infants and children <12 years of age may instead present with  $\geq 2$  of:

- irritability
- vomiting
- poor feeding
- tachypnea
- lethargy

#### **AND**

2.  $\geq 1$  new finding of:
  - troponin level above upper limit of normal (any type of troponin)
  - abnormal electrocardiogram (ECG or EKG) or rhythm monitoring findings consistent with myocarditis\*
  - abnormal cardiac function or wall motion abnormalities on echocardiogram
  - cMRI findings consistent with myocarditis<sup>†</sup>

#### **AND**

3. No other identifiable cause of the symptoms and findings

#### Confirmed Case

1. Presence of  $\geq 1$  new or worsening of the following clinical symptoms:
  - chest pain/pressure/discomfort
  - dyspnea/shortness of breath/pain with breathing
  - palpitations
  - syncope

OR, infants and children <12 years of age may instead present with  $\geq 2$  of:

- irritability
- vomiting
- poor feeding
- tachypnea
- lethargy

#### **AND**

2.  $\geq 1$  new finding of
  - Histopathologic confirmation of myocarditis<sup>§</sup>
  - cMRI findings consistent with myocarditis<sup>†</sup> in the presence of troponin level above upper limit of normal (any type of troponin)

#### **AND**

3. No other identifiable cause of the symptoms and findings

---

\*To meet the ECG or rhythm monitoring criterion, must include at least one of:

- ST-segment or T-wave abnormalities
- Paroxysmal or sustained atrial, supraventricular, or ventricular arrhythmias
- AV nodal conduction delays or intraventricular conduction defects

<sup>†</sup>Using either the original or the revised Lake Louise criteria (Ferreira et al. *J Am Coll Cardiol*. 2018;72:3158-76)

<sup>§</sup>Using the Dallas criteria (Aretz et al. *Am J Cardiovasc Pathol*. 1987;1:3-14)

#### Notes:

1. Autopsy cases may be classified as confirmed clinical myocarditis on the basis of meeting histopathologic criteria if no other identifiable cause
2. Cases with individuals who lack the listed symptoms but who meet other criteria may be classified as subclinical myocarditis (probable or confirmed)

## **Acute Pericarditis**

Presence of  $\geq 2$  new or worsening of the following clinical features:

- acute chest pain\*
- pericardial rub on exam,
- new ST-elevation or PR-depression on EKG, or
- new or worsening pericardial effusion on echocardiogram or MRI

\*typically described as pain made worse by lying down, deep inspiration, or cough and relieved by sitting up or leaning forward, although other types of chest pain may occur.

Notes:

1. Autopsy cases may be classified as pericarditis on basis of meeting histopathologic criteria of the pericardium

## **Myopericarditis**

This term may be used for patients who meet criteria for both myocarditis and pericarditis.

The following form was used to collect information on suspected cases:

## VAERS Adverse Events of Special Interest: Myocarditis medical record review

Record ID \_\_\_\_\_

### Patient Information

Enter all available information as noted in the VAERS report or medical record. If unknown, select unknown.

VAERS ID \_\_\_\_\_

Is this VAERS ID linked to another VAERS ID

- Yes \_\_\_\_\_  
 No \_\_\_\_\_

Date VAERS received the report

\_\_\_\_\_  
(MM-DD-YYYY (if unknown enter: 01-01-0000))

State where the VAERS report is coming from

\_\_\_\_\_  
(Please type out the full name)

First Name \_\_\_\_\_

Last Name \_\_\_\_\_

Date of birth

\_\_\_\_\_  
(MM-DD-YYYY (if unknown enter: 01-01-0000))

Sex

- Female  
 Male  
 Unknown

Ethnicity

- Hispanic/Latinx  
 Not Hispanic/Latinx  
 Unknown

Race  
(check all that apply)

- American Indian or Alaska Native  
 Asian  
 Black  
 Native Hawaiian or Other Pacific Islander  
 White  
 Unknown

**Vaccine Information**

Enter all available information as noted in the VAERS report or medical record. If unknown, select unknown.

Vaccine Date for Dose 1

---

(MM-DD-YYYY (if unknown enter: 01-01-0000))

Vaccine Manufacturer for Dose 1

- Pfizer-BioNTech  
 Moderna  
 J&J/Janssen  
 Not reported

Lot Number for Dose 1

---

Vaccination Date for Dose 2 (if applicable)

---

(MM-DD-YYYY (if unknown enter: 01-01-0000))

Vaccine Manufacturer for Dose 2

- Pfizer-BioNTech  
 Moderna  
 J&J/Janssen  
 Not reported

Lot Number for Dose 2

---

**Adverse Event of Special Interest**

Select AESI(s) for which this VAERS ID was assigned

- Anaphylaxis  
 Coagulopathy  
 COVID-19  
 Death  
 GBS  
 Kawasaki's Disease  
 MIS-A  
 MIS-C  
 Myocardial Infarction  
 Myopericarditis  
 Narcolepsy  
 Pregnancy  
 Seizure  
 Stroke  
 Transverse Myelitis  
 Other

### Myocarditis, Pericarditis, and Myopericarditis

Is this case a rule-out based on the initial VAERS report?

- Yes  
 No

If yes, enter the reason for rule-out and stop abstraction,

- Miscode of diagnosis  
 Miscode of demographic information (i.e. age)  
 Other \_\_\_\_\_

Are medical records available

- Yes  
 No

Was the health provider contacted and interviewed?

- Yes  
 No

Did a physician diagnose the patient's response as myopericarditis, myocarditis, pericarditis? (e.g. was the VAERS report filed by a physician, or do available medical records state, "Doctor diagnosed...myopericarditis, myocarditis, pericarditis?")

- Yes  
 No

What was the physician diagnosis?

- Myopericarditis  
 Myocarditis only  
 Pericarditis only

Did the patient develop signs and symptoms within 42 days following vaccine administration?

- Yes  
 No

Did symptoms occur following dose 1?

- Yes  
 No

Did symptoms occur following dose 2?

- Yes  
 No

How many days after receipt of their last dose?

\_\_\_\_\_  
((in days))

Did the patient, during the same 42 day period, have upper respiratory illness or flu-like symptoms (fever, cough, malaise, etc.) or have documented illness or signs/symptoms consistent with the following pathogens or illnesses:

- Yes  
 No

Adenoviruses  
Coxsackieviruses (especially Coxsackievirus B)  
Herpesviruses (such as cytomegalovirus, Epstein Barr virus, HHV 6)  
Echovirus  
Enterovirus  
Hepatitis B or C virus  
Influenza A or B  
Parvovirus B19

Please select all that apply

- Adenoviruses
- Coxsackieviruses (especially Coxsackievirus B)
- Herpesviruses (such as cytomegalovirus, Epstein Barr virus, HHV 6)
- Echovirus
- Enterovirus
- Hepatitis B or C virus
- Influenza A or B
- Parvovirus B19
- Other infection, please specify \_\_\_\_\_

---

Did the patient have a history of myocarditis, pericarditis, or myopericarditis?

- Yes
- No

---

Please specify

- Myopericarditis
- Myocarditis only
- Pericarditis only

---

Did the patient have a history of any of the following conditions (check all that apply):

- Rheumatoid arthritis
- Scleroderma
- Systemic lupus erythematosus
- Sjogren's syndrome
- Other systemic inflammatory illness

---

Please specify the other systemic inflammatory illness

\_\_\_\_\_

---

Did the patient have a history of exposure to the following (check all that apply):

- Alcohol (e.g. > 2 drinks/day for months or longer, or recent heavy binge drinking)
- Procainamide
- Isoniazid
- Hydralazine
- Anthracycline
- Heavy metals (e.g., mercury, cadmium)
- None of the above/medical history does not indicate a history of exposure

---

List symptoms present (check all that apply)

- Chest pain/pressure/discomfort
- Dyspnea/shortness of breath/pain with breathing
- Palpitations
- Irritability/fussiness
- Nausea/vomiting
- Poor feeding/loss of appetite
- Tachypnea
- Lethargy
- Pleuritic chest pain without another attributable cause (e.g., pneumonia)
- Pericardial rub
- Conjunctivitis
- Diarrhea
- Fever (highest temp known and duration at presentation)
- Headache
- Rash
- Other (specify)
- None of the above

---

What is the highest temp known?

\_\_\_\_\_



---

What is the duration of the fever at presentation?

\_\_\_\_\_

((in days))

---

Please specify the other symptoms that are present:

---

Diagnostic tests (check all that apply)

- ECG/EKG or other rhythm monitoring
- Imaging (e.g., echocardiography, cMRI) showing depressed left ventricular function
- Any echocardiogram
- Cardiac Magnetic Resonance Imaging (cMRI)
- Cardiac enzymes: peak value for any of the following labs
- Histopathologic evidence of myocardial inflammation (e.g., biopsy or autopsy)
- Histopathologic evidence of pericardial inflammation (e.g., biopsy or autopsy)

---

What were the results of the imaging test?

- Normal
- Abnormal \_\_\_\_\_
- Inconclusive \_\_\_\_\_

---

ECG/EKG or other rhythm monitoring results details

- ST elevation/ST abnormalities
- T-wave abnormalities/abnormal repolarization
- PR depression without reciprocal ST depression
- Atrial, supraventricular, or ventricular arrhythmia
- Conduction delays or blocks
- AV block 1st degree
- AV block 2nd degree - Type 1
- AV block 2nd degree - Type 2
- AV block 3rd degree
- Frequent atrial or ventricular ectopy

---

Were any of these EKG findings considered abnormal?

- Yes
- No

---

Any echocardiogram details

- Decreased left ventricular function
- Pericardial effusion
- Ejection fraction percentage
- Left ventricular strain
- Normal echocardiogram

---

What was the severity of the decreased left ventricular function?

- Mild
- Moderate
- Severe

---

How severe was the pericardial effusion?

- Trivial
- Small
- Moderate
- Large

---

Is the lowest ejection fraction percentage less than 46%?

- Yes
- No

---

Please list the lowest ejection fraction percentage recorded

\_\_\_\_\_

((in percent))

---

Was there ever any left ventricular strain?  Yes  
 No  
 Unknown

---

Any cMRI details (Please check all that apply)  Abnormal cardiac function  
 Wall motion abnormality  
 Findings consistent with myocarditis (per Lake Louise criteria)  
 Normal cMRI

---

Cardiac enzyme details  Troponin I \_\_\_\_\_  
If selected, please enter the values and units.  Troponin C \_\_\_\_\_  
 Troponin T \_\_\_\_\_  
 CKMB \_\_\_\_\_  
 BNP \_\_\_\_\_  
 Pro-BNP \_\_\_\_\_  
 CRP \_\_\_\_\_  
 ESR \_\_\_\_\_

---

Were any of the Troponin levels noted above elevated?  Yes  
 No

---

Were any of these cardiac enzymes tests/assays considered elevated (above the normal range)?  Yes  
 No

---

Was the patient hospitalized?  Yes  
 No

---

Were there treatments administered during hospitalization for myocarditis?  Yes  
 No

---

Please check all the treatments that were received  Aspirin  
 NSAIDS other than aspirin (e.g. ketorolac/Toradol, ibuprofen/Motrin/Advil, naproxen/Naprosyn/Aleve, colchicine)  
 Corticosteroids (e.g. prednisone, methylprednisolone, hydrocortisone)  
 IVIG  
 Vasoactive medications (e.g. milrinone, epinephrine, norepinephrine, vasopressin, dopamine)  
 Diuretics (e.g. furosemide/Lasix, cholorothiazide/Diuril)  
 Antiarrhythmics  
 Immunomodulators (e.g. anakinra/Kineret, tocilizumab/Actemra, infliximab/Remicade)  
 Anticoagulation other than aspirin (Warfarin/Coumadin, Plavix/Clopidogrel)  
 Regular/Low flow Nasal cannula oxygen support  
 High flow nasal cannula  
 Intubation or mechanical ventilation  
 Cardioversion/Shock  
 ECMO (extracorporeal membrane oxygenation)  
 VAD (ventricular assist device)  
 Intra-aortic balloon pump  
 Heart transplant  
 Other \_\_\_\_\_

---

Were treatments administered?  Yes  
 No

Please indicate if the following were administered:

- Aspirin
- Acetaminophen/Tylenol
- Other \_\_\_\_\_

### Disposition

What was the patient's outcome?

- Still hospitalized
- ICU
- Discharged

Where was the patient discharged to?

- Another facility
- Home

Has the patient fully recovered from their symptoms?

- Yes
- No

Please specify what symptoms and/or difficulties the patient still has:

\_\_\_\_\_

Please describe the patient's disposition

\_\_\_\_\_

The disposition was last updated on

\_\_\_\_\_

Does this report meet one of the above case definitions?

- Probable myocarditis
- Confirmed myocarditis
- Pericarditis
- Myopericarditis (probable or confirmed)
- Not a case

### Additional impressions

Initial presentation of the case, additional impressions, clarifications, or comments:

\_\_\_\_\_

If this review is still ongoing/not completed AND your VAERS deployment is ending, please select yes,

- Yes
- No

If this review is completed, please select no.

Abstraction status

- Awaiting review (abstraction not started yet)
- VAERS report only - the only available record for review is the VAERS report form itself
- Incomplete - other records are available, but insufficient information is available to complete abstraction
- Complete - all data fields for abstraction have been completed, with data from provider interview and/or medical record review
- Not applicable/misclassified

**eFigure.** Flow diagram of cases of myocarditis and pericarditis reported to Vaccine Adverse Event Reporting System (VAERS) after receiving mRNA-based COVID-19 vaccine, United States, December 14, 2020-August 31, 2021

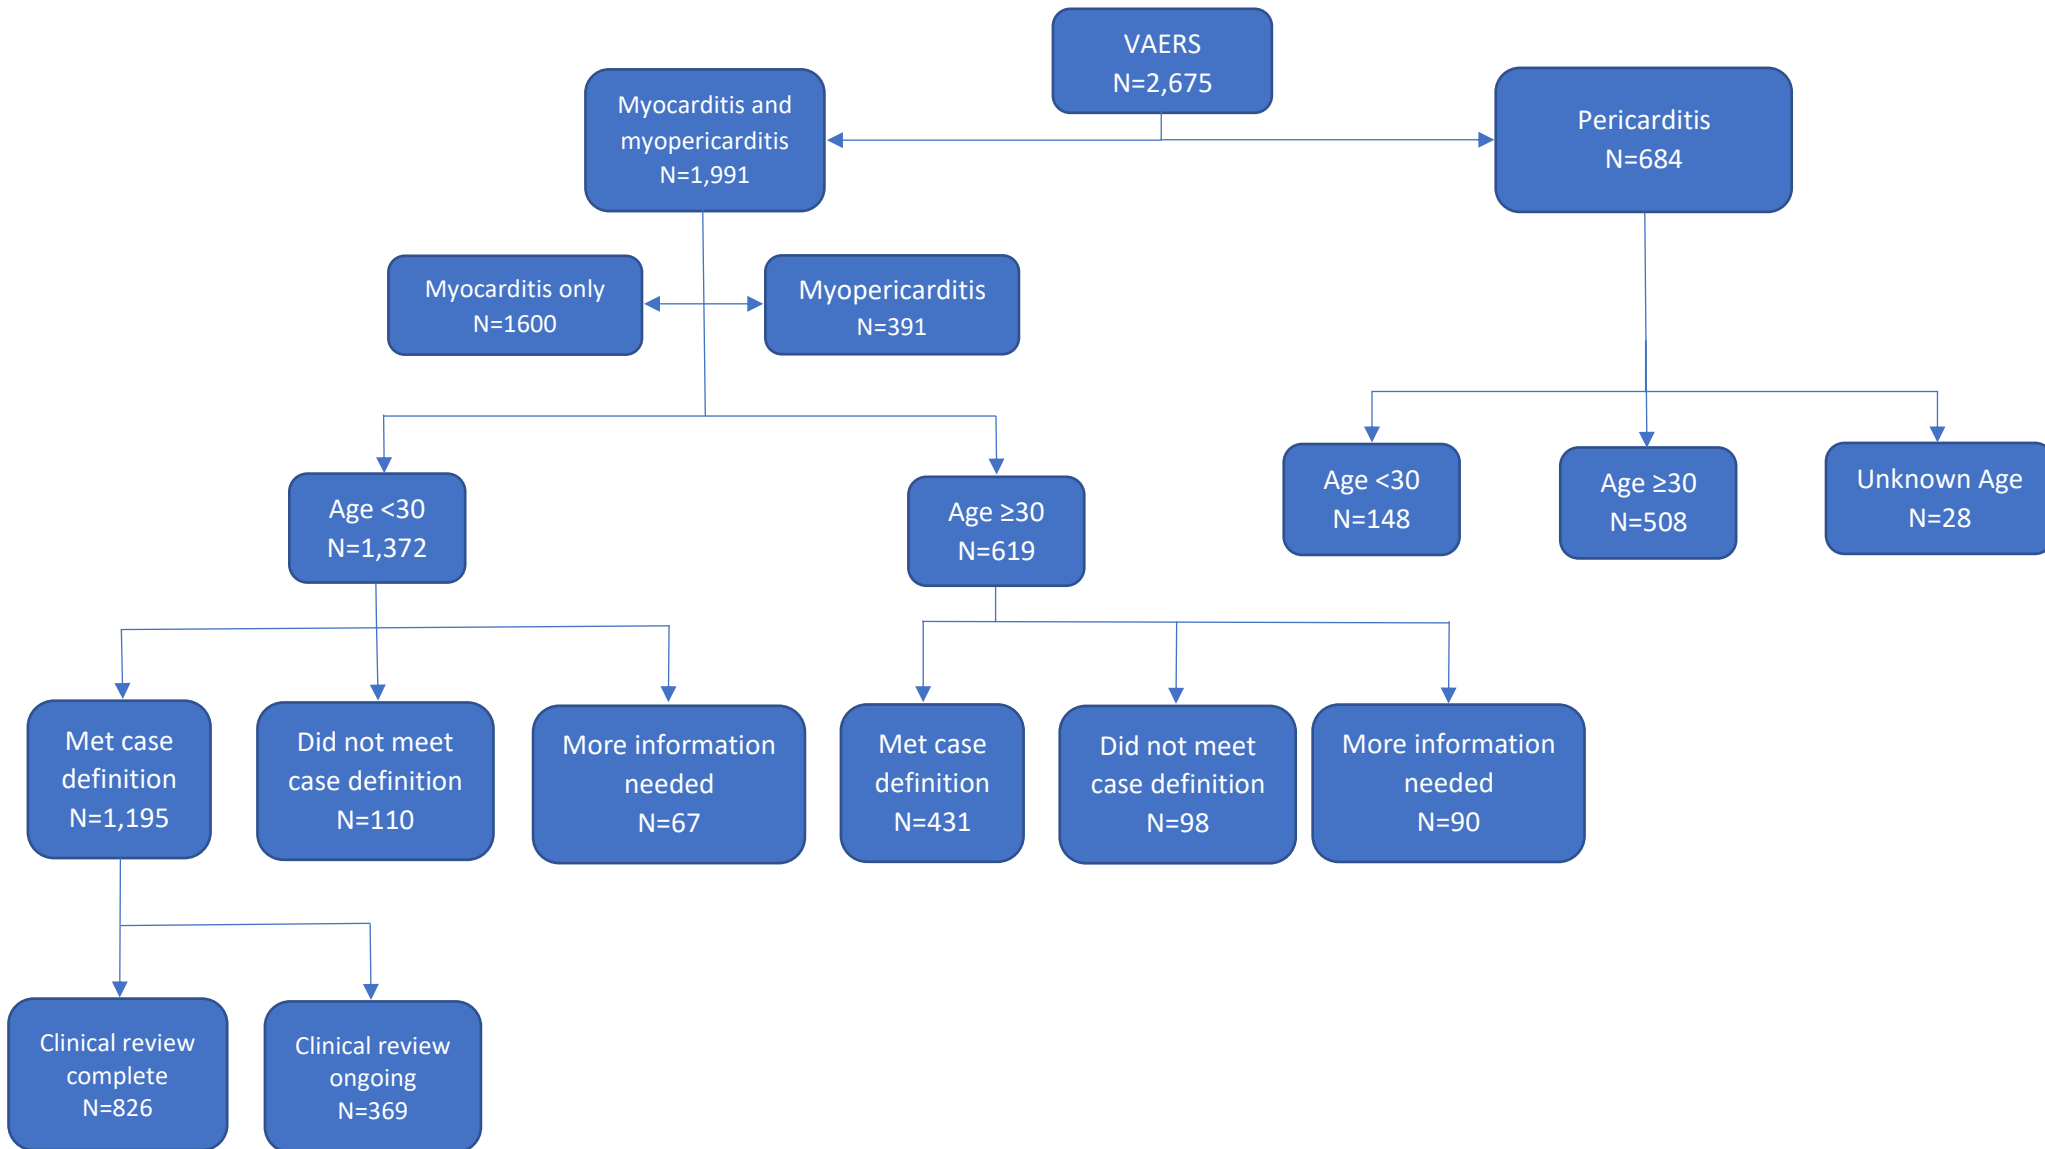

**eTable 1.** Characteristics of all myocarditis cases reported to Vaccine Adverse Event Reporting System (VAERS) after mRNA-based COVID-19 vaccination, United States, December 14, 2020–August 31, 2021

|                                                                | BNT162b2      |               |               | mRNA-1273     |               |               | Total         |
|----------------------------------------------------------------|---------------|---------------|---------------|---------------|---------------|---------------|---------------|
|                                                                | Dose 1        | Dose 2        | Dose Unknown  | Dose 1        | Dose 2        | Dose Unknown  |               |
| Number of pericarditis reports to VAERS                        | 216           | 1,066         | 103           | 174           | 390           | 42            | 1,991         |
| Doses administered                                             | 114,246,837   | 95,532,396    | —             | 78,158,611    | 66,163,001    | —             | 354,100,845   |
| Median Age, years (interquartile range (IQR))                  | 22<br>(16–38) | 18<br>(16–28) | 21<br>(16–33) | 32<br>(24–53) | 26<br>(21–39) | 29<br>(21–39) | 22<br>(17–34) |
| Median time to symptom onset, days (interquartile range (IQR)) | 3<br>(1–8)    | 2<br>(1–3)    | 3<br>(1–5)    | 4<br>(2–9)    | 3<br>(1–3)    | 3<br>(1–5)    | 2<br>(1–4)    |
| Known sex, n (%)                                               | N=215         | N=1062        | N=101         | N=173         | N=389         | N=41          | N=1981        |
| Male                                                           | 147 (68)      | 879 (83)      | 83 (82)       | 120 (69)      | 295 (76)      | 32 (78)       | 1556 (79)     |
| Female                                                         | 68 (32)       | 183 (17)      | 18 (18)       | 53 (31)       | 94 (24)       | 9 (22)        | 425 (21)      |
| Known race/ethnicity <sup>a</sup> n (%)                        | N=191         | N=887         | N=65          | N=133         | N=313         | N=27          | N=1606        |
| American Indian or Alaska Native                               | 2 (1)         | 5 (1)         | 0 (0)         | 2 (2)         | 1 (<1)        | 0 (0)         | 10 (1)        |
| Asian                                                          | 13 (7)        | 68 (8)        | 5 (8)         | 5 (4)         | 10 (3)        | 1 (4)         | 102 (6)       |
| Black                                                          | 13 (7)        | 40 (5)        | 7 (11)        | 10 (8)        | 16 (5)        | 4 (15)        | 90 (6)        |
| Hispanic                                                       | 45 (25)       | 139 (16)      | 12 (18)       | 26 (20)       | 38 (12)       | 7 (26)        | 267 (17)      |
| Multiple                                                       | 4 (2)         | 15 (2)        | 0 (0)         | 0 (0)         | 7 (2)         | 1 (4)         | 27 (2)        |
| Native Hawaiian or Other Pacific Islander                      | 1 (1)         | 5 (1)         | 1 (2)         | 1 (1)         | 0 (0)         | 0 (0)         | 8 (<1)        |
| Other                                                          | 0 (0)         | 7 (1)         | 0 (0)         | 0 (0)         | 1 (<1)        | 0 (0)         | 8 (<1)        |
| White                                                          | 103 (57)      | 608 (69)      | 40 (62)       | 89 (67)       | 240 (77)      | 14 (52)       | 1094 (68)     |

<sup>a</sup> Race categories without ethnicity were either non-Hispanic or had no ethnicity reported.

**eTable 2.** Characteristics of all pericarditis cases reported to Vaccine Adverse Event Reporting System (VAERS) after mRNA-based COVID-19 vaccination, United States, December 14, 2020–August 31, 2021

|                                                                | BNT162b2      |               |               | mRNA-1273     |               |               | Total         |
|----------------------------------------------------------------|---------------|---------------|---------------|---------------|---------------|---------------|---------------|
|                                                                | Dose 1        | Dose 2        | Dose Unknown  | Dose 1        | Dose 2        | Dose Unknown  |               |
| Number of pericarditis reports to VAERS                        | 111           | 240           | 68            | 82            | 134           | 49            | 684           |
| Doses administered                                             | 114,246,837   | 95,532,396    | —             | 78,158,611    | 66,163,001    | —             | 354,100,845   |
| Median Age, years (interquartile range (IQR))                  | 45<br>(30–60) | 45<br>(28–60) | 41<br>(25–56) | 52<br>(38–67) | 54<br>(38–66) | 56<br>(40–64) | 48<br>(31–62) |
| Median time to symptom onset, days (interquartile range (IQR)) | 4<br>(1–12)   | 10<br>(2–28)  | 15<br>(2–33)  | 6<br>(2–15)   | 13<br>(2–32)  | 22<br>(7–66)  | 8<br>(2–26)   |
| Known sex, n (%)                                               | N=111         | N=238         | N=67          | N=81          | N=134         | N=47          | N=678         |
| Male                                                           | 59 (53)       | 149 (62)      | 45 (67)       | 43 (53)       | 81 (60)       | 31 (66)       | 408 (60)      |
| Female                                                         | 52 (47)       | 89 (37)       | 22 (33)       | 38 (47)       | 53 (40)       | 16 (34)       | 270 (40)      |
| Known race/ethnicity <sup>a</sup> n (%)                        | N=98          | N=210         | N=57          | N=60          | N=110         | N=42          | N=577         |
| American Indian or Alaska Native                               | 0 (0)         | 0 (0)         | 0 (0)         | 0 (0)         | 0 (0)         | 1 (2)         | 1 (0)         |
| Asian                                                          | 6 (6)         | 11 (5)        | 4 (7)         | 2 (3)         | 2 (2)         | 1 (2)         | 26 (5)        |
| Black                                                          | 3 (3)         | 18 (9)        | 3 (5)         | 4 (7)         | 7 (6)         | 0 (0)         | 35 (6)        |
| Hispanic                                                       | 10 (10)       | 18 (9)        | 7 (12)        | 4 (7)         | 6 (5)         | 6 (14)        | 51 (9)        |
| Multiple                                                       | 2 (2)         | 6 (3)         | 1 (2)         | 0 (0)         | 2 (2)         | 0 (0)         | 11 (2)        |
| Native Hawaiian or Other Pacific Islander                      | 2 (2)         | 1 (<1)        | 0 (0)         | 0 (0)         | 0 (0)         | 0 (0)         | 3 (1)         |
| Other                                                          | 3 (3)         | 2 (1)         | 2 (4)         | 0 (0)         | 2 (2)         | 1 (2)         | 10 (2)        |
| White                                                          | 72 (73)       | 154 (73)      | 40 (70)       | 50 (83)       | 91 (83)       | 33 (79)       | 440 (76)      |

<sup>a</sup> Race categories without ethnicity were either non-Hispanic or had no ethnicity reported.

**eTable 3.** Characteristics of myocarditis cases reported to Vaccine Adverse Event Reporting System after mRNA-based COVID-19 vaccination by case definition status

|                                                        | Aged <30 years      |                              |                         | Aged ≥30 years      |                              |                         |
|--------------------------------------------------------|---------------------|------------------------------|-------------------------|---------------------|------------------------------|-------------------------|
|                                                        | Met case definition | Did not meet case definition | More information needed | Met case definition | Did not meet case definition | More information needed |
| Number of reports to VAERS                             | 1,195               | 110                          | 67                      | 431                 | 98                           | 90                      |
| Median time to symptom onset, days (IQR <sup>a</sup> ) | 2 (1–3)             | 3 (1–8)                      | 2 (2–4)                 | 3 (2–8)             | 4 (1–9)                      | 3 (1–8)                 |
| Known sex, n (%) <sup>b</sup>                          | N=1,195             | N=103                        | N=66                    | N=430               | N=97                         | N=90                    |
| Male                                                   | 1050 (88)           | 72 (70)                      | 55 (83)                 | 284 (66)            | 45 (46)                      | 50 (56)                 |
| Female                                                 | 145 (12)            | 31 (30)                      | 11 (17)                 | 146 (34)            | 52 (54)                      | 40 (44)                 |
| Known race/ethnicity, n (%) <sup>c</sup>               | N=969               | N=287                        | N=38                    | N=361               | N=81                         | N=70                    |
| American Indian or Alaska Native                       | 3 (0)               | 2 (2)                        | 0 (0)                   | 3 (1)               | 1 (1)                        | 1 (1)                   |
| Asian                                                  | 70 (7)              | 12 (14)                      | 3 (8)                   | 14 (4)              | 2 (2)                        | 1 (1)                   |
| Black                                                  | 45 (5)              | 9 (10)                       | 4 (11)                  | 23 (6)              | 5 (6)                        | 4 (6)                   |
| Hispanic                                               | 188 (19)            | 14 (16)                      | 5 (13)                  | 40 (11)             | 12 (15)                      | 8 (11)                  |
| Multiple                                               | 14 (1)              | 5 (6)                        | 2 (5)                   | 3 (1)               | 2 (2)                        | 1 (1)                   |
| Native Hawaiian or Other Pacific Islander              | 5 (1)               | 0 (0)                        | 0 (0)                   | 2 (1)               | 0 (0)                        | 1 (1)                   |
| Other                                                  | 6 (1)               | 2 (2)                        | 0 (0)                   | 0 (0)               | 0 (0)                        | 0 (0)                   |
| White                                                  | 638 (66)            | 43 (49)                      | 24 (63)                 | 276 (76)            | 59 (73)                      | 54 (77)                 |

<sup>a</sup>Interquartile range

<sup>b</sup>For reports with sex of patient known

<sup>c</sup> For reports with race/ethnicity known; race categories without ethnicity were either non-Hispanic or had no ethnicity reported.
